# Supplementary material
Source: publisher figshare collection journal article supplement (https://asha.figshare.com/articles/dataset/_/28216151)
Supplement: Supplementary file 1 [file 1]

**Supplemental Material S2. ECI-A fidelity of administration tool.**

| #                                                                           | Item                                                                                                                                                                                              | Yes | No | NA | If no, comments |
|-----------------------------------------------------------------------------|---------------------------------------------------------------------------------------------------------------------------------------------------------------------------------------------------|-----|----|----|-----------------|
| <b>Unexpected Item</b> (Form A: Coloring + Pen OR Form B: Puzzle + Pop Toy) |                                                                                                                                                                                                   |     |    |    |                 |
| UI-1                                                                        | Engages naturally with child with distractor toy<br><i>EXAMPLES: attempts to create routine but may depend on child interest/attention, for about 1 minute but may be faster</i>                  |     |    |    |                 |
| UI-2                                                                        | Presents unexpected item to child<br><i>NOTE: places pen in box OR hands pop toy to child, can alter to ensure child sees/notices unexpected item</i>                                             |     |    |    |                 |
| UI-3                                                                        | Creates opportunity for child initiation<br><i>EXAMPLES: continues with previous actions, stays quiet, limited prompting</i>                                                                      |     |    |    |                 |
| UI-4                                                                        | Responds naturally to child communication                                                                                                                                                         |     |    |    |                 |
| Tr-1                                                                        | Successful transition to ECI toys (removal of UI toys, presents ECI house/barn and accompanying toys)                                                                                             |     |    |    |                 |
| <b>Fidget</b> (Form A: Bead bag OR Form B: Water log)                       |                                                                                                                                                                                                   |     |    |    |                 |
| F-1                                                                         | Places item within the house/barn toy set<br><i>NOTE: ideally while child is distracted but okay if not, may move item if child does not see/notice</i>                                           |     |    |    |                 |
| F-2                                                                         | Creates opportunity for child initiation<br><i>EXAMPLES: continues with previous actions/play, stays quiet, limited prompting</i>                                                                 |     |    |    |                 |
| F-3                                                                         | Responds naturally to child communication                                                                                                                                                         |     |    |    |                 |
| Tr-2                                                                        | Removes fidget from play set within about 60 seconds or less after child notices toy<br><i>NOTE: okay if caregiver removes even if child never notices toy</i>                                    |     |    |    |                 |
| <b>ECI Play Set</b> (Form A: House OR Form B: Farm)                         |                                                                                                                                                                                                   |     |    |    |                 |
| ECI-1                                                                       | Follows the child’s lead in play<br><i>EXAMPLES: follows along with child’s initiations, avoids redirection as long as child is playing safely with ECI toys or engaged with the play partner</i> |     |    |    |                 |
| ECI-2                                                                       | Interacts in non-directive manner<br><i>EXAMPLES: limits specific prompts (e.g., “do this”, “say _____”), limits repeated questions (e.g., what is this? What does the cow say?)</i>              |     |    |    |                 |
| ECI-3                                                                       | Comments about what child is doing <del>with toys</del>                                                                                                                                           |     |    |    |                 |
| ECI-4                                                                       | Describes what they (play partner) are doing                                                                                                                                                      |     |    |    |                 |

|                                                                         |                                                                                                                                                                                                 |  |  |  |  |
|-------------------------------------------------------------------------|-------------------------------------------------------------------------------------------------------------------------------------------------------------------------------------------------|--|--|--|--|
| <b>ECI-5</b>                                                            | Engages in playful/friendly manner                                                                                                                                                              |  |  |  |  |
| <b>ECI-6</b>                                                            | ECI toy set is out for at least 6 minutes                                                                                                                                                       |  |  |  |  |
| <b>Activated Toy</b> (Form A: Massager <i>OR</i> Form B: Wand)          |                                                                                                                                                                                                 |  |  |  |  |
| <b>AT-1</b>                                                             | Activates toy (ideally while child is distracted, but okay if not possible)                                                                                                                     |  |  |  |  |
| <b>AT-2</b>                                                             | Creates opportunity for child initiation<br><i>EXAMPLES: continues with previous actions/play, stays quiet, limited prompting</i>                                                               |  |  |  |  |
| <b>AT-3</b>                                                             | Responds naturally to child communication                                                                                                                                                       |  |  |  |  |
| <b>Tr-3</b>                                                             | Successful transition to toy collection probe (removal of AT toy, removal of ECI house/barn and accompanying toys)                                                                              |  |  |  |  |
| <b>Toy Collection</b> (Form A: Surprise bag <i>OR</i> Form B: Dress-up) |                                                                                                                                                                                                 |  |  |  |  |
| <b>TC-1</b>                                                             | Presents the toy collection<br><i>NOTE: surprise bag-opens bag &amp; puts in reach of child, dress-up-puts in reach of child &amp; takes out toys</i>                                           |  |  |  |  |
| <b>TC-2</b>                                                             | Creates opportunity for child initiation<br><i>EXAMPLES: pauses or stays quiet at times, appears distracted, limited prompting</i>                                                              |  |  |  |  |
| <b>TC-3</b>                                                             | Responds naturally to child communication                                                                                                                                                       |  |  |  |  |
| <b>TC-4</b>                                                             | Allows for at least 1 minute of time with the toy collection                                                                                                                                    |  |  |  |  |
| <b>General</b>                                                          |                                                                                                                                                                                                 |  |  |  |  |
| <b>G-1</b>                                                              | Single play partner was involved throughout the ECI-A with the ECI-A materials                                                                                                                  |  |  |  |  |
| <b>G-2</b>                                                              | Completed <b>without</b> significant adaptations<br><i>NON-EXAMPLES: additional toys added to support engagement, pacifier left in throughout, other adults/children engaged with the child</i> |  |  |  |  |
| <b>G-3</b>                                                              | Child engaged <b>without</b> frequent need for redirection                                                                                                                                      |  |  |  |  |
