# Supplementary material
Source: publisher figshare collection journal article supplement (https://asha.figshare.com/articles/dataset/_/28216151)
Supplement: Supplementary file 2 [file 1]

## Supplemental Material S1. ECI-A procedures.

| Activity             | Form A                                                                                                                                                              | Form B                                                                                                                                                                    |
|----------------------|---------------------------------------------------------------------------------------------------------------------------------------------------------------------|---------------------------------------------------------------------------------------------------------------------------------------------------------------------------|
| Unexpected Item      | Caregiver engages child in coloring activity routine then places a feather pen in the marker box                                                                    | Caregiver engages child in puzzle then gives them a pop bracelet instead of a puzzle piece                                                                                |
| Transition 1         | Clean up coloring activity and move to play set                                                                                                                     | Clean up puzzle and move to play set                                                                                                                                      |
| Play set             | Caregiver and child play with the toy house and associated figurines as the caregiver follows the child’s lead                                                      | Caregiver and child play with the toy barn and associated figurines as the caregiver follows the child’s lead                                                             |
| Fidget               | After about 3 minutes of play with the house, caregiver places squishy bead bag in the play set where child is likely to see                                        | After about 3 minutes of play with the barn, caregiver places water log in the play set where child is likely to see                                                      |
| Transition 2         | Remove bead bag and continue play with house                                                                                                                        | Remove water log and continue play with house                                                                                                                             |
| Play set (continued) | Caregiver and child continue playing with the toy house and associated figurines                                                                                    | Caregiver and child continue playing with the toy barn and associated figurines                                                                                           |
| Activated Toy        | After about 6 minutes of play with the house, caregiver activates the massager and places it in the play set where child is likely to see                           | After about 6 minutes of play with the barn, caregiver activates the light-up wand and places it in the play set where child is likely to see                             |
| Transition 3         | Clean up play set and activated toy and move to surprise bag activity                                                                                               | Clean up play set and activated toy and move to dress-up activity                                                                                                         |
| Toy Collection       | Caregiver presents the bag of toys to child and allows the child to discover the toys, allowing the child to initiate communication and then responding accordingly | Caregiver engages child in dress-up activity by trying on clothes and looking in the mirror, allowing the child to initiate communication and then responding accordingly |
